# Supplementary material for: fosA3 overexpression with transporter mutations mediates high-level of fosfomycin resistance and silence of fosA3 in fosfomycin-susceptible Klebsiella pneumoniae producing carbapenemase clinical isolates
Source: PubMed Central journal article supplement (PMC7454978; doi:10.1371/journal.pone.0237474), 2020-08-28
Supplement: pone.0237474.s001.pdf [file pone.0237474.s001.pdf]

**S1 Table. Oligonucleotide sequences of primers used in this study.**

| Gene         | Primer sequences               | PCR product size (bp) | Reference     |
|--------------|--------------------------------|-----------------------|---------------|
| <i>fosA</i>  | F- ATCTGTGGGTCTGCCTGTCGT       | 271                   | Lu et al. [1] |
|              | R- ATGCCCGCATAGGGCTTCT         |                       |               |
| <i>fosA3</i> | F- CGGAGCCTATCTCTCCTGTG        | 219                   | this study    |
|              | R- CCGTCAGGGTCGAGAAAATA        |                       |               |
| <i>fosA5</i> | F- GCGCCGAGCGTGGCGTTT          | 283                   | this study    |
|              | R- GCCATCGGGATCGAGGAA          |                       |               |
| <i>fosB</i>  | F- AGGTGAGACCTCGGCCTATT        | 302                   | this study    |
|              | R- GAGGTTTAGCCTCTTTATAATAACTCA |                       |               |
| <i>fosC2</i> | F- GGGCATATCTGAGCTTGGAG        | 212                   | this study    |
|              | R- CAATTTATGGCCGTCAGGAT        |                       |               |
| <i>fosX</i>  | F- GTTGCGTTTAAGGCAGGAAG        | 425                   | this study    |
|              | R- GGCTCCATTTGTTGGACAGT        |                       |               |

Reference

1. Lu PL, Hsieh YJ, Lin JE, Huang JW, Yang TY, Lin L, Tseng SP (2016) Characterisation of fosfomycin resistance mechanisms and molecular epidemiology in extended-spectrum beta-lactamase-producing *Klebsiella pneumoniae* isolates. Int J Antimicrob Agents 48 (5):564-568. doi:10.1016/j.ijantimicag.2016.08.013 PMID: 27765412
