# Supplementary material for: fosA3 overexpression with transporter mutations mediates high-level of fosfomycin resistance and silence of fosA3 in fosfomycin-susceptible Klebsiella pneumoniae producing carbapenemase clinical isolates
Source: PubMed Central journal article supplement (PMC7454978; doi:10.1371/journal.pone.0237474), 2020-08-28
Supplement: pone.0237474.s002.pdf [file pone.0237474.s002.pdf]

**S2 Table. Characteristics of *K. pneumoniae* and *E. coli* DH5 $\alpha$  transformants.**

| Strains                           | Fos gene            | Carbapenemase gene                                       | MIC (mg/L) |          |           |
|-----------------------------------|---------------------|----------------------------------------------------------|------------|----------|-----------|
|                                   |                     |                                                          | Fosfomycin | Imipenem | Meropenem |
| KP23                              | <i>fosA3, fosA5</i> | <i>bla</i> <sub>NDM</sub>                                | 16         | 16       | 128       |
| KP58                              | <i>fosA3, fosA5</i> | <i>bla</i> <sub>NDM</sub>                                | >256       | 256      | 256       |
| KP44                              | <i>fosA3, fosA5</i> | <i>bla</i> <sub>OXA-48</sub>                             | 32         | 4        | 16        |
| KP51                              | <i>fosA3, fosA5</i> | <i>bla</i> <sub>OXA-48</sub>                             | >256       | 8        | 32        |
| KP5                               | <i>fosA3, fosA5</i> | <i>bla</i> <sub>NDM</sub> , <i>bla</i> <sub>OXA-48</sub> | 32         | 32       | 64        |
| KP4                               | <i>fosA3, fosA5</i> | <i>bla</i> <sub>NDM</sub> , <i>bla</i> <sub>OXA-48</sub> | >256       | 32       | 64        |
| KP6                               | <i>fosA3, fosA5</i> | <i>bla</i> <sub>NDM</sub> , <i>bla</i> <sub>OXA-48</sub> | >256       | 32       | 64        |
| KP15                              | <i>fosA3, fosA5</i> | <i>bla</i> <sub>NDM</sub> , <i>bla</i> <sub>OXA-48</sub> | >256       | 32       | 64        |
| KP18                              | <i>fosA3, fosA5</i> | <i>bla</i> <sub>NDM</sub> , <i>bla</i> <sub>OXA-48</sub> | >256       | 256      | 256       |
| KP19                              | <i>fosA3, fosA5</i> | <i>bla</i> <sub>NDM</sub> , <i>bla</i> <sub>OXA-48</sub> | >256       | >256     | 256       |
| KP7                               | <i>fosA3, fosA5</i> | <i>bla</i> <sub>NDM</sub> , <i>bla</i> <sub>OXA-48</sub> | >256       | 64       | 128       |
| DH5 $\alpha$                      | No                  | No                                                       | 0.5        | 0.25     | 0.015     |
| DH5 $\alpha$ / <i>fosA3</i> _KP23 | <i>fosA3</i>        | No                                                       | 32         | 0.25     | 0.015     |
| DH5 $\alpha$ / <i>fosA3</i> _KP58 | <i>fosA3</i>        | No                                                       | 128        | 0.25     | 0.015     |
| DH5 $\alpha$ / <i>fosA3</i> _KP44 | <i>fosA3</i>        | <i>bla</i> <sub>OXA-48</sub>                             | 16         | 0.25     | 0.015     |
| DH5 $\alpha$ / <i>fosA3</i> _KP51 | <i>fosA3</i>        | <i>bla</i> <sub>OXA-48</sub>                             | >256       | 0.5      | 0.03      |
| DH5 $\alpha$ / <i>fosA3</i> _KP5  | <i>fosA3</i>        | <i>bla</i> <sub>OXA-48</sub>                             | 32         | 0.25     | 0.015     |
| DH5 $\alpha$ / <i>fosA3</i> _KP4  | <i>fosA3</i>        | <i>bla</i> <sub>OXA-48</sub>                             | 32         | 0.25     | 0.015     |
| DH5 $\alpha$ / <i>fosA3</i> _KP6  | <i>fosA3</i>        | <i>bla</i> <sub>OXA-48</sub>                             | 128        | 0.5      | 0.015     |
| DH5 $\alpha$ / <i>fosA3</i> _KP15 | <i>fosA3</i>        | <i>bla</i> <sub>OXA-48</sub>                             | 128        | 0.25     | 0.03      |
| DH5 $\alpha$ / <i>fosA3</i> _KP18 | <i>fosA3</i>        | <i>bla</i> <sub>OXA-48</sub>                             | 64         | 0.25     | 0.03      |
| DH5 $\alpha$ / <i>fosA3</i> _KP19 | <i>fosA3</i>        | <i>bla</i> <sub>OXA-48</sub>                             | 128        | 0.25     | 0.015     |
| DH5 $\alpha$ / <i>fosA3</i> _KP7  | <i>fosA3</i>        | <i>bla</i> <sub>OXA-48</sub>                             | 256        | 0.5      | 0.03      |
